# Supplementary material for: The long non-coding RNA HOXB-AS3 regulates ribosomal RNA transcription in NPM1-mutated acute myeloid leukemia
Source: PubMed Central journal article supplement (PMC6877618; doi:10.1038/s41467-019-13259-2), 2019-11-25
Supplement: 41467_2019_13259_MOESM1_ESM.pdf [file 41467_2019_13259_MOESM1_ESM.pdf]

## **SUPPLEMENTARY INFORMATION**

**The long non-coding RNA *HOXB-AS3* regulates ribosomal RNA transcription in *NPM1*-mutated acute myeloid leukemia**

*Papaioannou et al.*

## Supplementary Figures

### Supplementary Fig. 1. Schematic diagram of different *HOXB-AS3* transcript variants.

Transcript variant is NR\_033201.2 has been characterized in colorectal cancer, whereas variant NR\_033202.2 is the *HOXB-AS3* transcript variant that is studied in AML. Unless otherwise stated, all experiments in the manuscript refer to transcript variant NR\_033202.2. Exons are depicted as boxes and introns are depicted as lines. Strand specificity of transcripts is annotated by the direction of arrows. The protein coding *HOXB5* and *HOXB6* transcripts are also included in the diagram for reference.

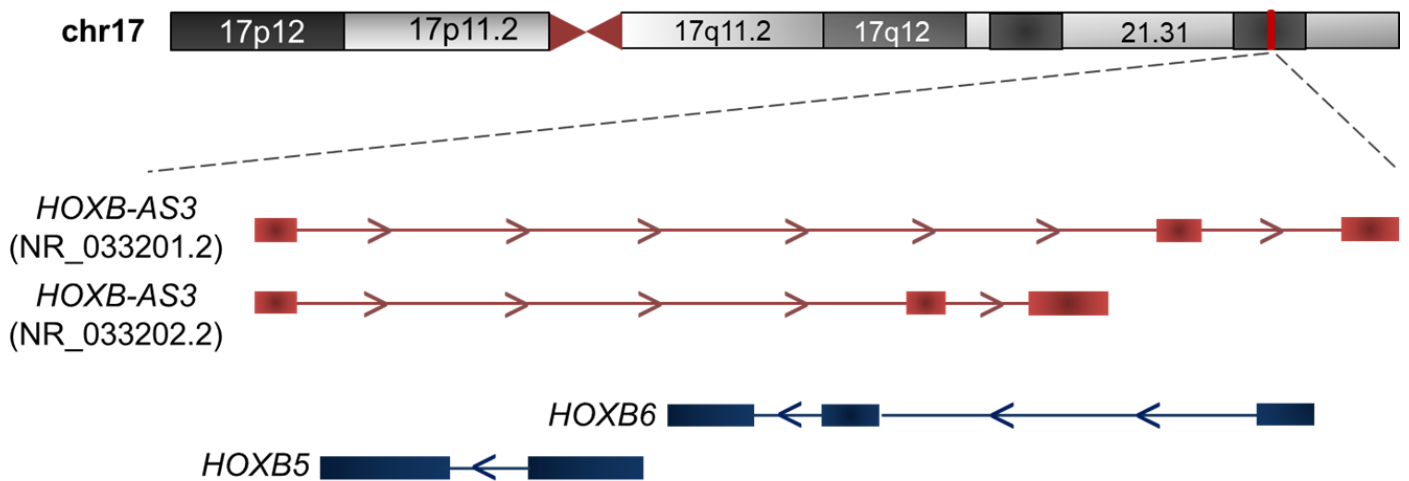

**Supplementary Fig. 2. Expression profiling of the *HOXB-AS3* lncRNA in a dataset of younger adult CN-AML patients by *NPM1* mutation type. a, *HOXB-AS3* RNA expression (depicted as fold change) in younger adult CN-AML patients with wild-type *NPM1* (*NPM1*wt; n=140) and in those Type A *NPM1* mutations (*NPM1*mutA; n=208). b, *HOXB-AS3* RNA expression (depicted as fold change) in younger adult CN-AML patients with wild-type *NPM1* (*NPM1*wt; n=140) and in those Type B *NPM1* mutations (*NPM1*mutB; n=15). *P* values were calculated using the Wilcoxon rank sum test. . In the figures, line in boxplots indicates the mean value for each population. Whiskers indicate highest and lowest values in each population.**

**a**

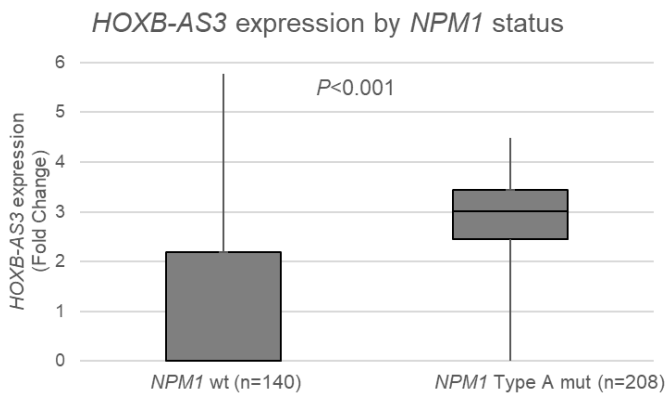

**b**

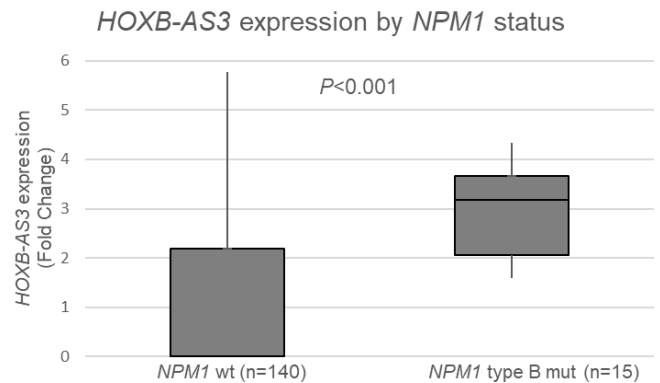

**Supplementary Fig. 3. Expression of the *HOXB-AS3* lncRNA across healthy hematopoietic cells and AML subtypes.** **a**, *HOXB-AS3* RNA expression among different cytogenetic subtypes of AML and ALL, in CLL, CML, MDS and in healthy hematopoietic cells isolated from bone marrow, based on the publicly available dataset of the International Microarray Innovations in Leukemia Study Group. Red color indicates high and blue low expression here and in Figs S1B and S1C. **b**, *HOXB-AS3* RNA expression among different cytogenetic AML subtypes in the publicly available dataset of The Cancer Genome Atlas project. **c**, *HOXB-AS3* expression among different molecular subtypes of cytogenetically normal AML in the publicly available dataset of The Cancer Genome Atlas project. Figs S1A-S1C were acquired through the Bloodspot portal ([www.bloodspot.eu](http://www.bloodspot.eu)).

**a**

*HOXB-AS3* (correlation of samples)

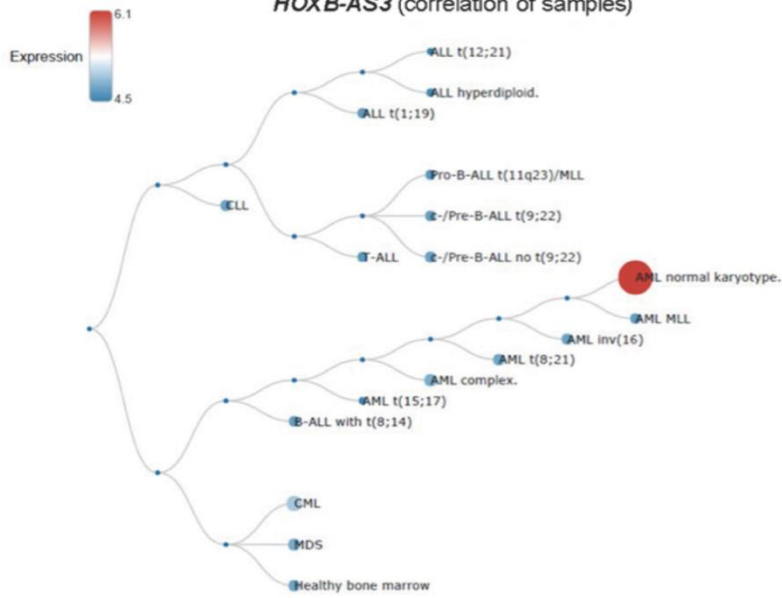

**b**

*HOXB-AS3* (correlation of samples)

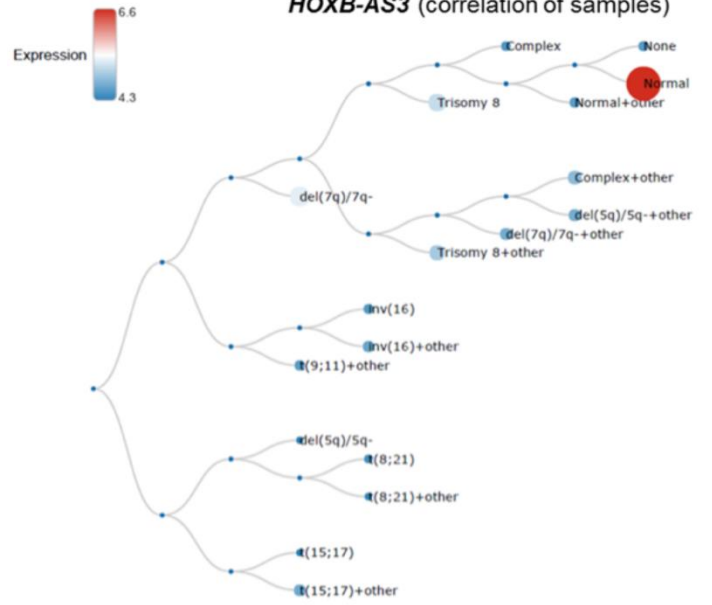

**c**

*HOXB-AS3* (correlation of samples)

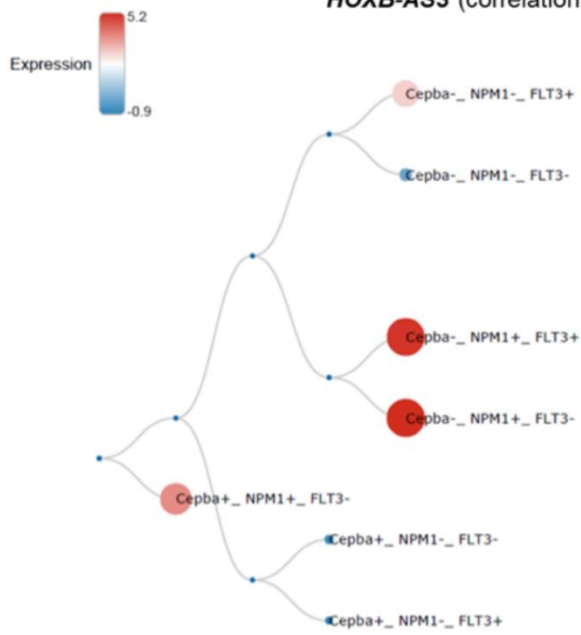

**Supplementary Fig. 4: Impact of *HOXB-AS3* KD on the viability of OCI-AML3 cells.** **a**, Apoptosis evaluation in OCI-AML3 cells treated with either non-targeting control (scramble) or *HOXB-AS3*-targeting gapmers (*HOXB-AS3* KD). Apoptosis analysis was conducted with Annexin V and propidium iodide staining followed by flow cytometry. Results of one experiment are depicted as an example. **b**, Comparison of percentages of viable, apoptotic (early and late) and necrotic cells in OCI-AML3 cells treated with either scramble or *HOXB-AS3* KD. Results of three independent experiments are depicted. N.S., not significant. *P* values were calculated using paired two-sided t-tests. In the figures, heights of boxplots indicate mean value with standard deviation. Whiskers indicate highest values in each population. Source data are provided as a Source Data file.

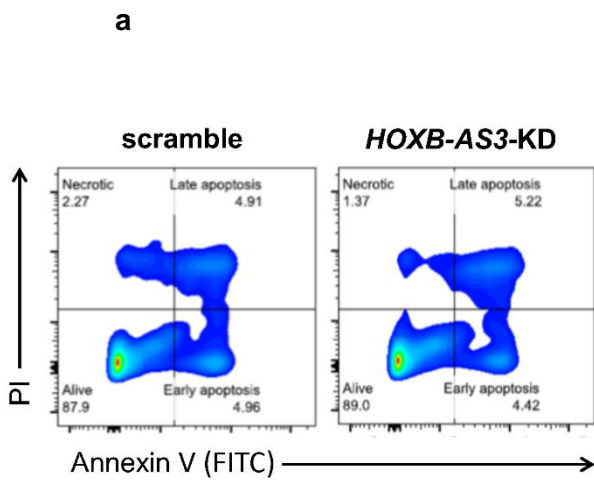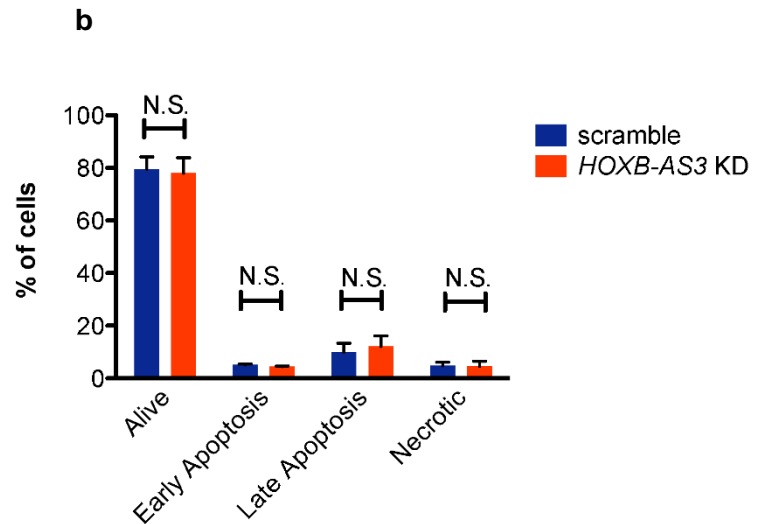

**Supplementary Fig. 5: Functional significance of *HOXB-AS3* KD in AML patients with *NPM1* wild-type (*NPM1wt*) and healthy hematopoietic progenitor cells.** **a** Number of colonies formed by scramble versus *HOXB-AS3* KD-treated, *NPM1wt* AML patient blasts in colony-forming unit assays. **b**, Number of total colonies formed by scramble versus *HOXB-AS3* KD-treated, CD34-selected umbilical cord blood cells, isolated from healthy donors. **c-e**, Results of **b** based on type of colony forming units: **c**, erythroid burst forming units. **d**, granulocyte, monocyte colony forming units. **e**, granulocyte, erythrocyte, monocyte, megakaryocyte colony forming units. All experiments were conducted in triplicates. N.S., not significant. *P* values were calculated using paired two-sided t-tests. In the figures, heights of boxplots indicate mean value with standard deviation. Whiskers indicate highest values in each population. Source data are provided as a Source Data file.

**a**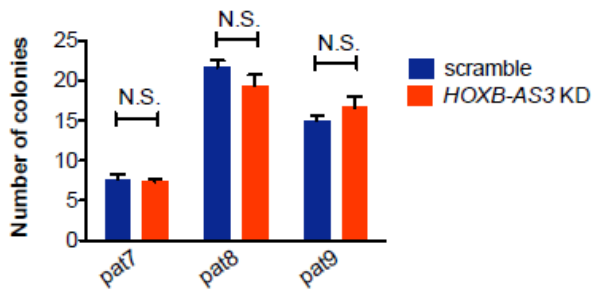**b**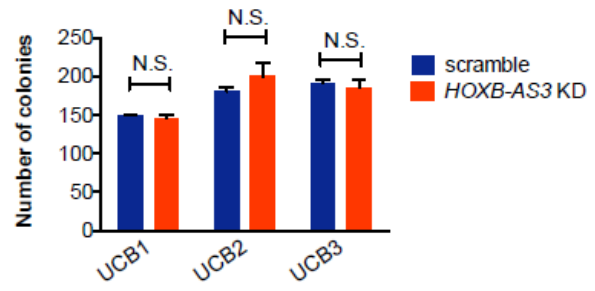**c**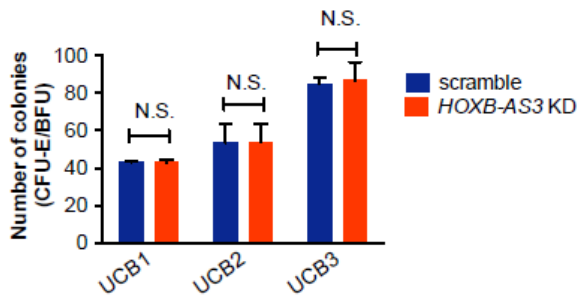**d**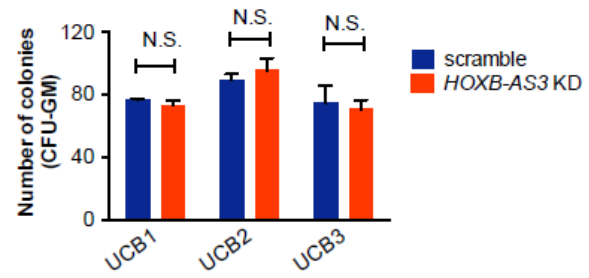**e**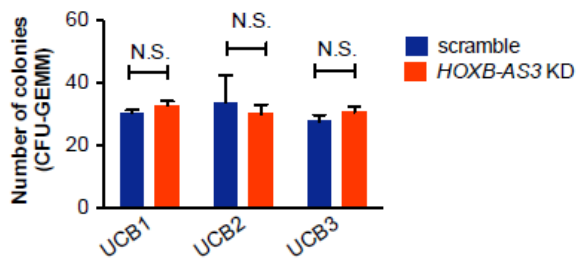



**Supplementary Fig. 6: Interaction of the *HOXB-AS3* long-non coding RNA with the transcriptome of OCI-AML3 cells.** **a-b**, Expression levels of different protein-coding *HOX* genes in the four *NPM1*mut AML patient samples (scramble versus *HOXB-AS3* KD). Expression is measured as transcripts per kilobase million (tpm). With regard to the protein coding *HOX* genes, only those that were meaningfully expressed (arbitrary cut-off of >30 tpm in at least one sample) are depicted. **c-g**, Expression levels of different protein-coding *HOX* genes in the OCI-AML3 samples (scramble versus *HOXB-AS3* KD). The three time points that were evaluated (12, 24 and 48 hours) are depicted separately. Expression is measured as transcripts per kilobase million (tpm). As above, only the *HOX* genes that had expression levels >30 tpm in at least one sample are depicted. In figures A-G, blue cycles represent scramble treated and orange squares *HOXB-AS3* KD-treated blasts. **h-k**, Relative *HOXA9*, *HOXA10*, *HOXB5*, and *HOXB6* mRNA expression in scramble versus *HOXB-AS3* KD OCI-AML3 cells at 48 hours post transfection. Threshold cycle (Ct) values of *HOX* mRNA were normalized against *GAPDH* mRNA Ct values. **l**, Western blot detection of the *HOXA9* protein levels in scramble and *HOXB-AS3* KD OCI-AML3 cells 48 hours post transfection. *ACTB* protein levels serve as loading controls between samples. *P* values were calculated using paired two-sided t-tests. In the figures, heights of boxplots indicate mean value with standard deviation. Whiskers indicate highest values in each population. Source data are provided as a Source Data file.

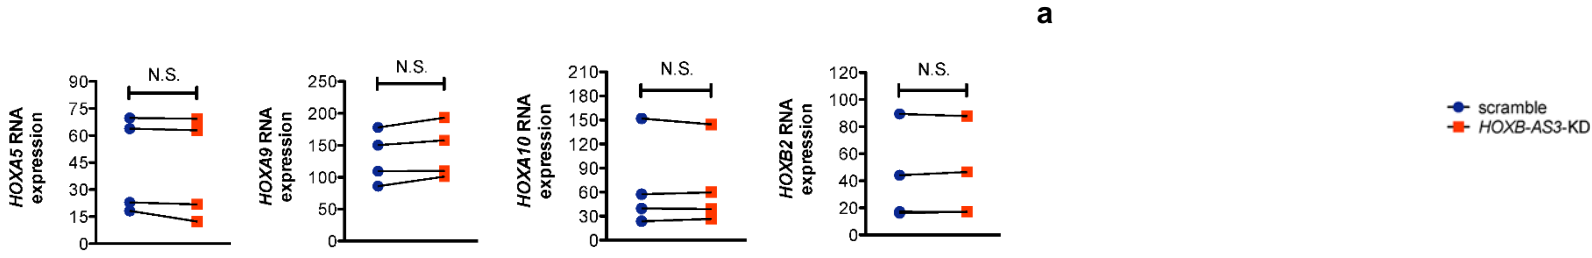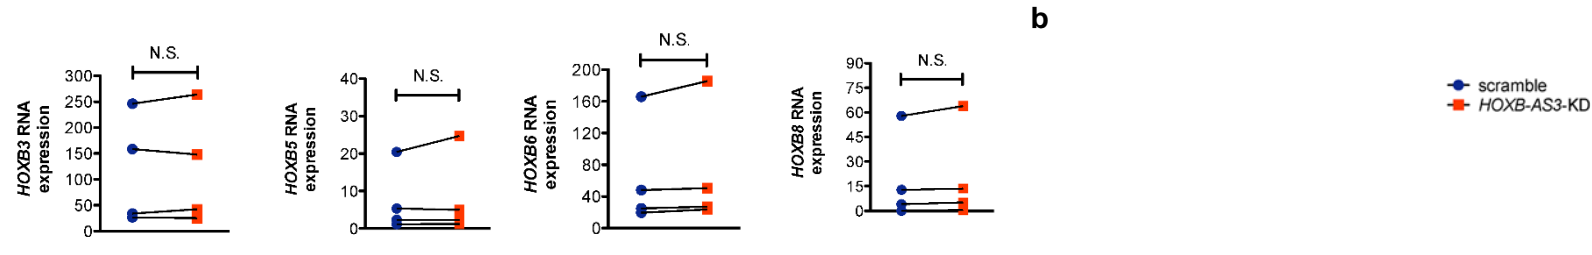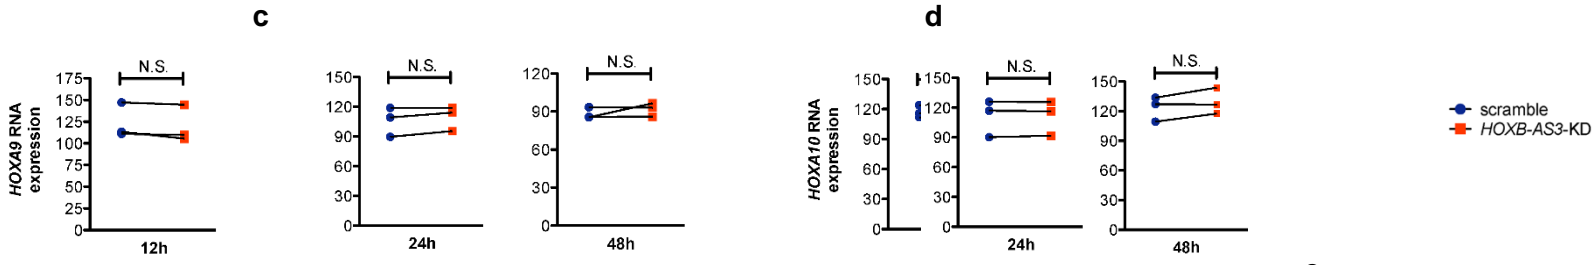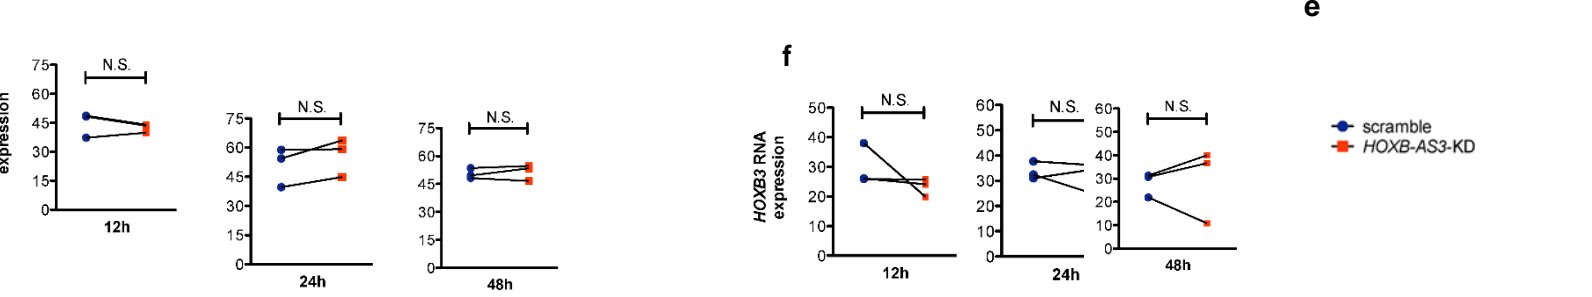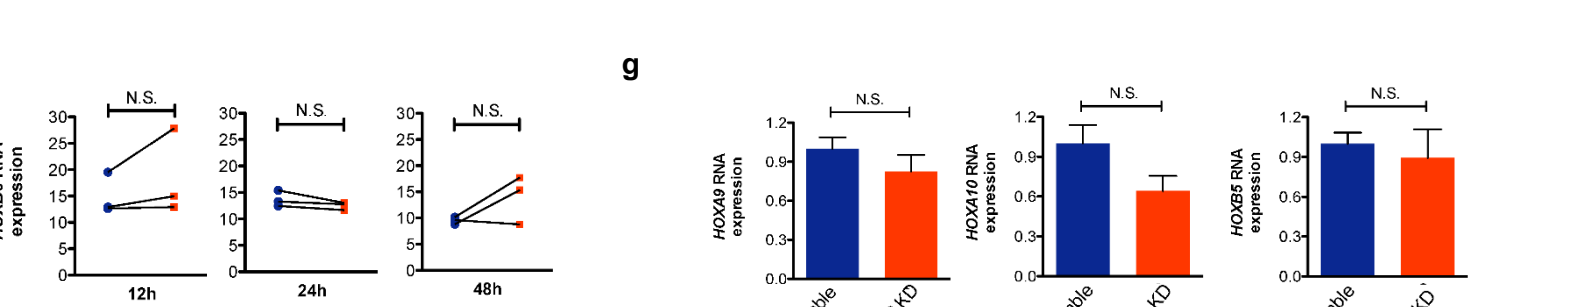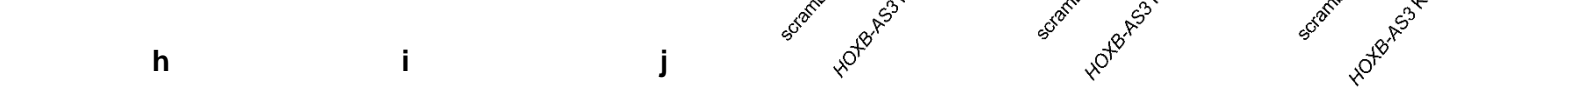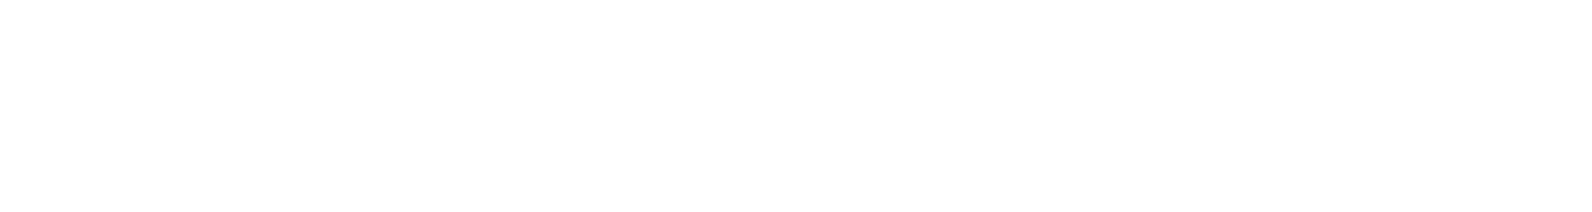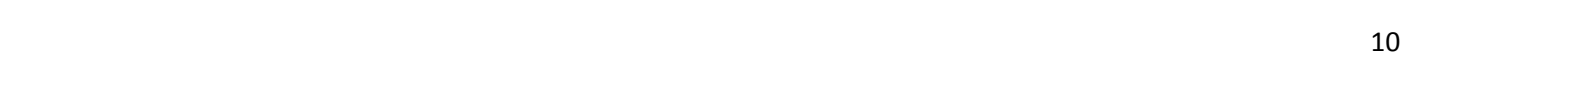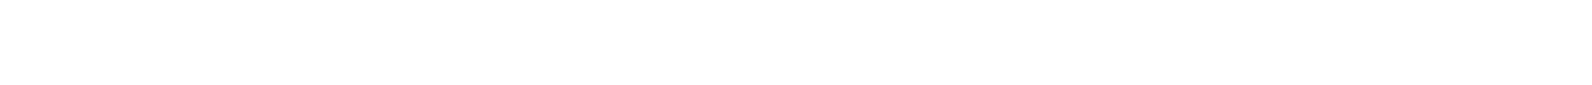

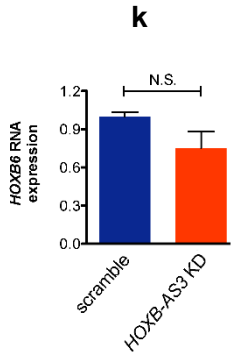

**l**

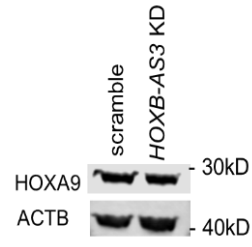

**Supplementary Fig. 7. Specificity of the *HOXB-AS3*-EBP1 interaction in OCI-AML3 cells.**

RNA-Immunoprecipitation (RIP) experiments were conducted in nuclear lysates of OCI-AML3 cells with an anti-EBP1 antibody. RNA eluates were profiled for expression levels of *HOXB-AS3* and other protein-coding (*GAPDH*, *ACTB*) and non-coding transcripts (*MALAT1*, *U6*). Enrichment of EBP1-immunoprecipitates is compared to IgG control. \*\*\*,  $P < 0.005$ ; N.S., not significant.  $P$  values were calculated using paired two-sided t-tests. In the figure, heights of boxplots indicate mean value with standard deviation. Whiskers indicate highest values in each population. Source data are provided as a Source Data file.

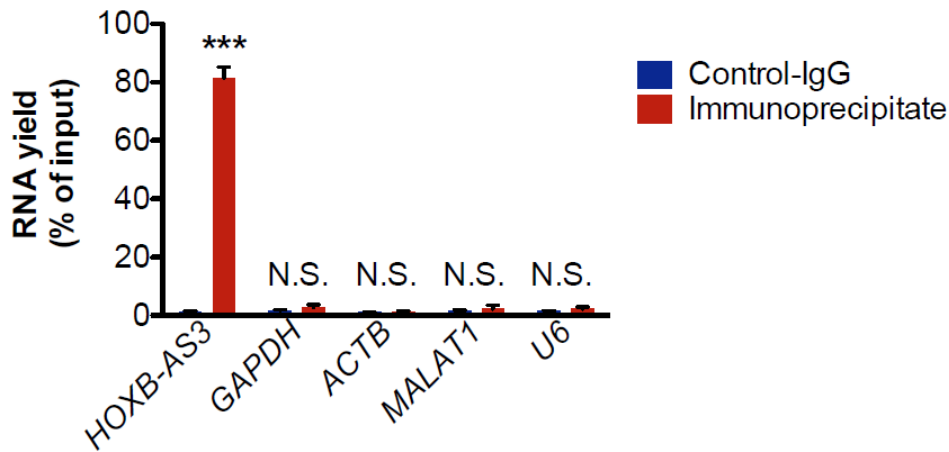

**Supplementary Fig. 8. Preferential interaction of the *HOXB-AS3* lncRNA with the p48 isoform of the EBP1.** RNA-Immunoprecipitation (RIP) experiments in nuclear lysates of K-562 cells, which were co-transfected with either of the FLAG epitope-tagged p42 or p48 isoforms of EBP1 and *HOXB-AS3*-overexpressing vectors. RNA eluates were profiled for expression levels of *HOXB-AS3*. Enrichment of FLAG-immunoprecipitates is compared to IgG control. *P* values were calculated using paired two-sided t-tests. In the figure, heights of boxplots indicate mean value with standard deviation. Whiskers indicate highest values in each population. Source data are provided as a Source Data file.

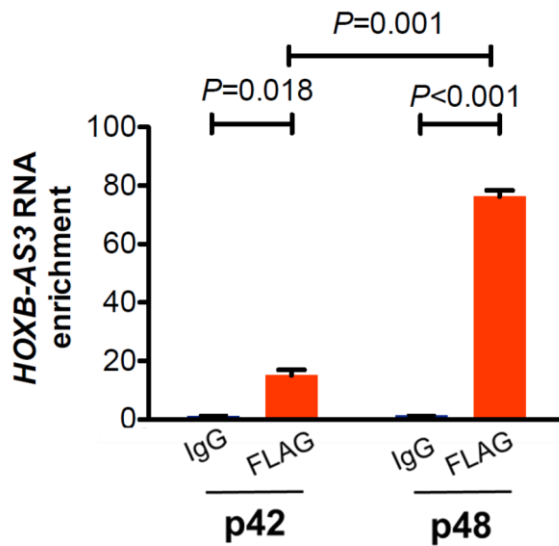

**Supplementary Fig. 9. EBP1 does not interact with the mutant NPM1 protein in the nucleus of OCI-AML3 cells.** **a**, Immunoprecipitation of the EBP1 protein in nuclear lysates of OCI-AML3 cells followed by denaturing gel electrophoresis and western blotting (WB) for the EBP1 and mutant NPM1 proteins. **b**, Immunoprecipitation of the mutant NPM1 protein in nuclear lysates of OCI-AML3 cells followed by WB for the EBP1 and mutant NPM1 proteins. Source data are provided as a Source Data file.

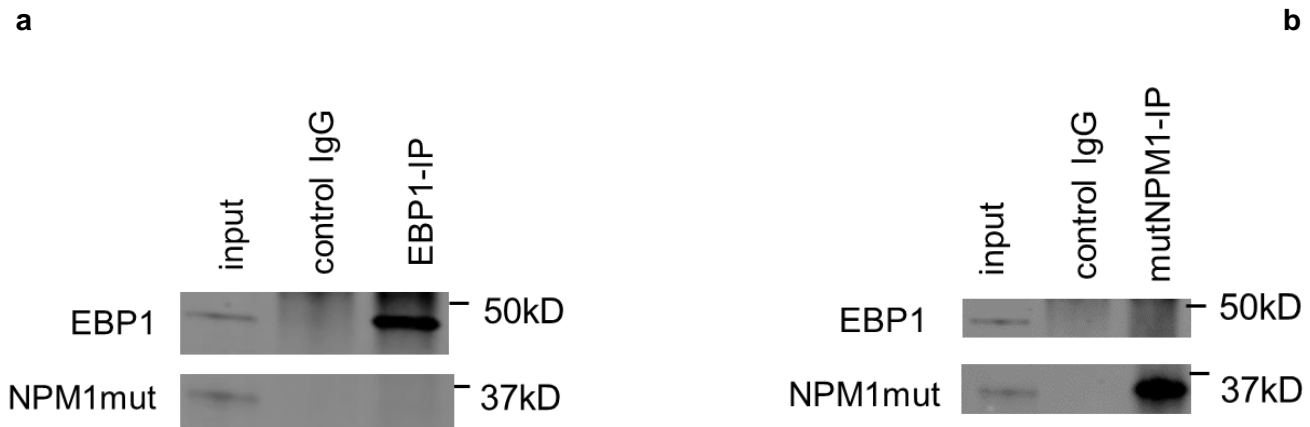

**Supplementary Fig. 10. Impact of *HOXB-AS3* long non-coding RNA knock-down (KD) on the *EBP1* RNA and *EBP1* protein abundance.** **a**, Relative *EBP1* mRNA and , **b**, *EBP1* protein expression in OCI AML3 cells treated with scramble versus anti-*HOXB-AS3* gapmers. In Fig. b ACTB is used as loading control. *P* values were calculated using paired two-sided t-tests. In the figure, heights of boxplots indicate mean value with standard deviation. Whiskers indicate highest values of individual samples in each population. Source data are provided as a Source Data file.

**a**

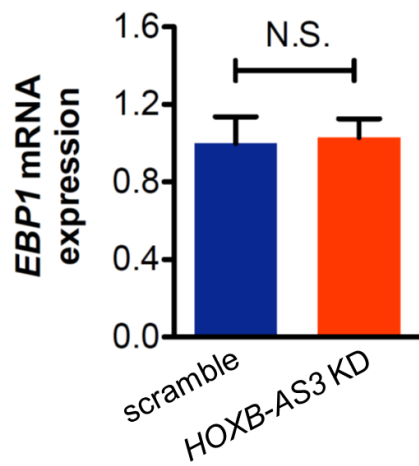

**b**

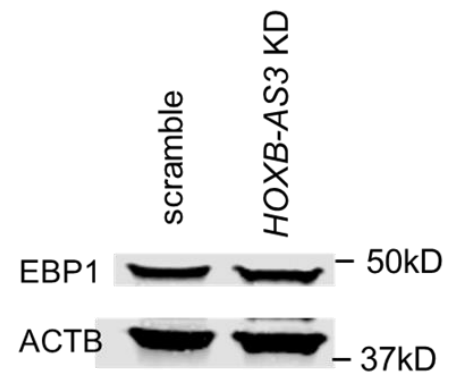

**Supplementary Fig. 11. Impact of *HOXB-AS3* knock-down (KD) on the binding of EBP1 protein on non-rDNA promoters.** Chromatin immunoprecipitations assays were conducted with an EBP1 targeting antibody in scramble versus *HOXB-AS3* KD treated cells followed by targeted profiling for the promoter region of *E2F1*. *P* values were calculated using paired two-sided t-tests. In the figure, heights of boxplots indicate mean value with standard deviation. Whiskers indicate highest values in each population. Source data are provided as a Source Data file.

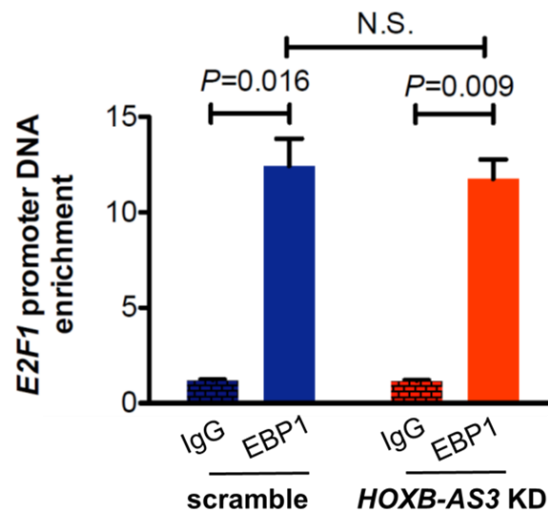



**Supplementary Fig. 12. Impact of *HOXB-AS3* knock-down (KD) on the binding of NPM1 protein on the rDNA locus.** Chromatin immunoprecipitations assays were conducted using NPM1-targetting antibodies in scramble versus *HOXB-AS3* KD treated cells followed by targeted profiling for the rDNA promoter region. *P* values were calculated using paired two-sided t-tests. In the figure, heights of boxplots indicate mean value with standard deviation. Whiskers indicate highest values in each population. Source data are provided as a Source Data file.

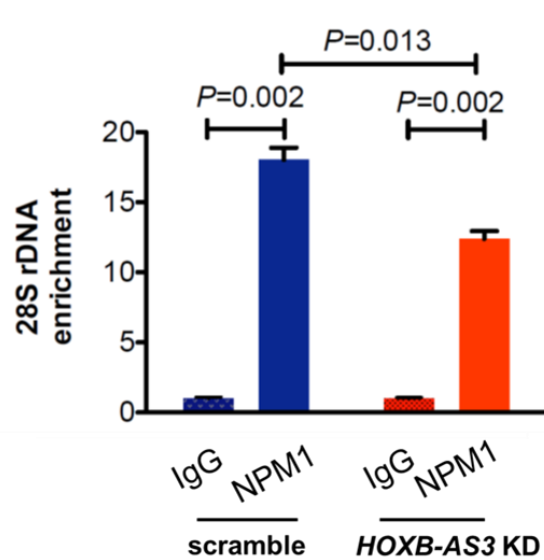

Supplementary Fig. 13. Relative *HOXB-AS3* expression in K-562 cells overexpressing *HOXB-AS3*<sup>wt</sup> or truncated *HOXB-AS3* variants 1 to 5 compared to empty vector control.

\*\*\* $P < 0.005$ ; \*\*\*\* $P < 0.001$ .  $P$  values were calculated using paired two-sided t-tests. In the figure, heights of boxplots indicate mean value with standard deviation. Whiskers indicate highest values in each population. Source data are provided as a Source Data file.

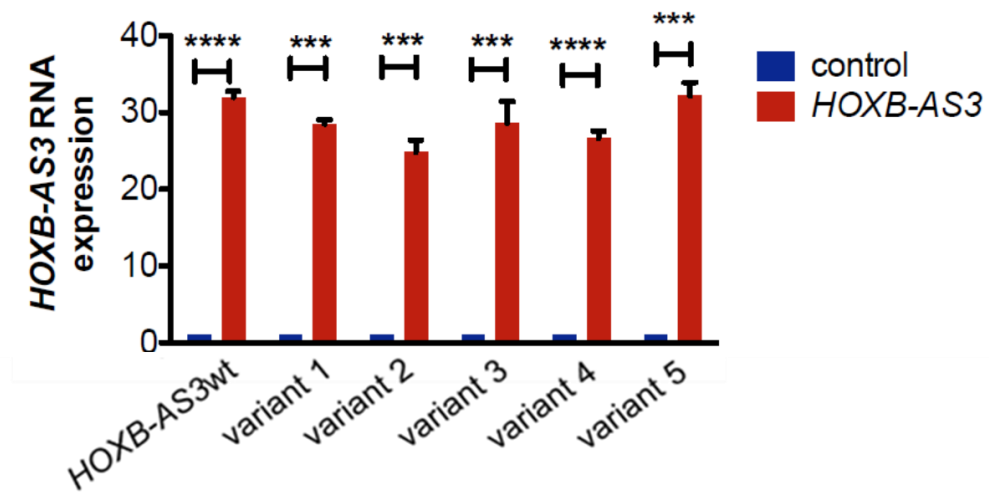

**Supplementary Fig. 14. Identification of the *HOXB-AS3* regions that mediate the interaction with different *HOXB-AS3* binding proteins.** **a**, NONO- and **b**, PHB1-targeting RIP experiments in K-562 cells overexpressing *HOXB-AS3*wt or truncated *HOXB-AS3* variants 1 to 5. The amount of *HOXB-AS3* that interacted with targeted proteins is depicted as enrichment in comparison to the rabbit IgG control. \*,  $P < 0.05$ ; \*\*,  $P < 0.01$ ; N.S., not significant.  $P$  values were calculated using paired two-sided t-tests. In the figure, heights of boxplots indicate mean value with standard deviation. Whiskers indicate highest values in each population. Source data are provided as a Source Data file.

**a**

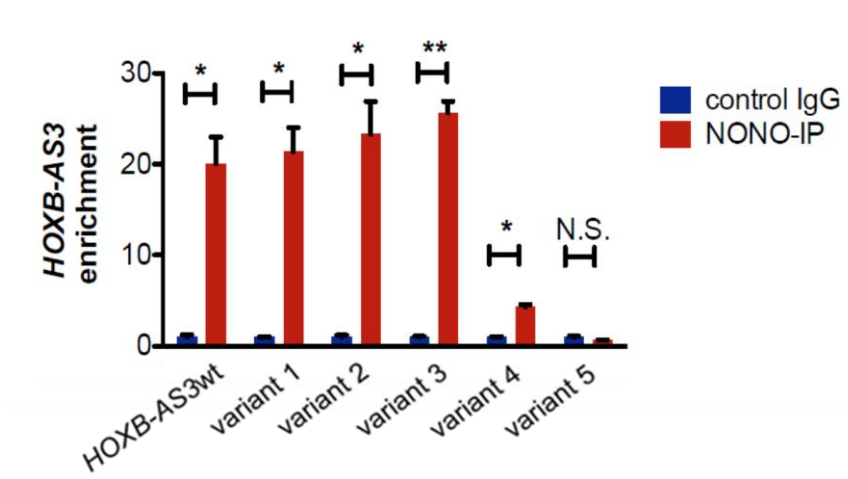

**b**

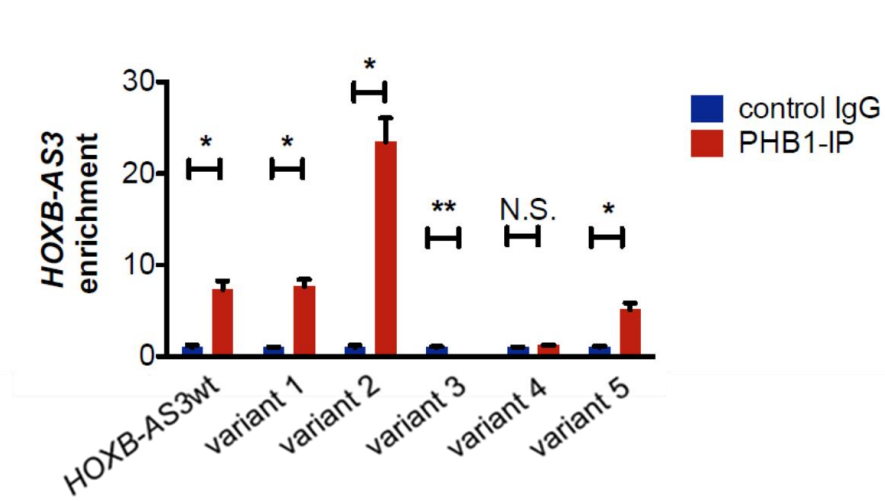

**Supplementary Fig. 15. Figure exemplifying the gating strategy for the conducted flow cytometry experiments.** BrdU graphs are provided as an example. **a**, Sideward (SSC-A) and forward scatter (FSC-A) settings and selection of live cells, **b**, **c**, negative control cells were used to set appropriate cut-offs. **b**, BrdU-negative cells were not labeled with BrdU but were stained with an anti-BrdU antibody. **c**, 7-AAD negative cells. **d**, BrdU/7-AAD-based cell cycle analysis of OCI-AML3 cells

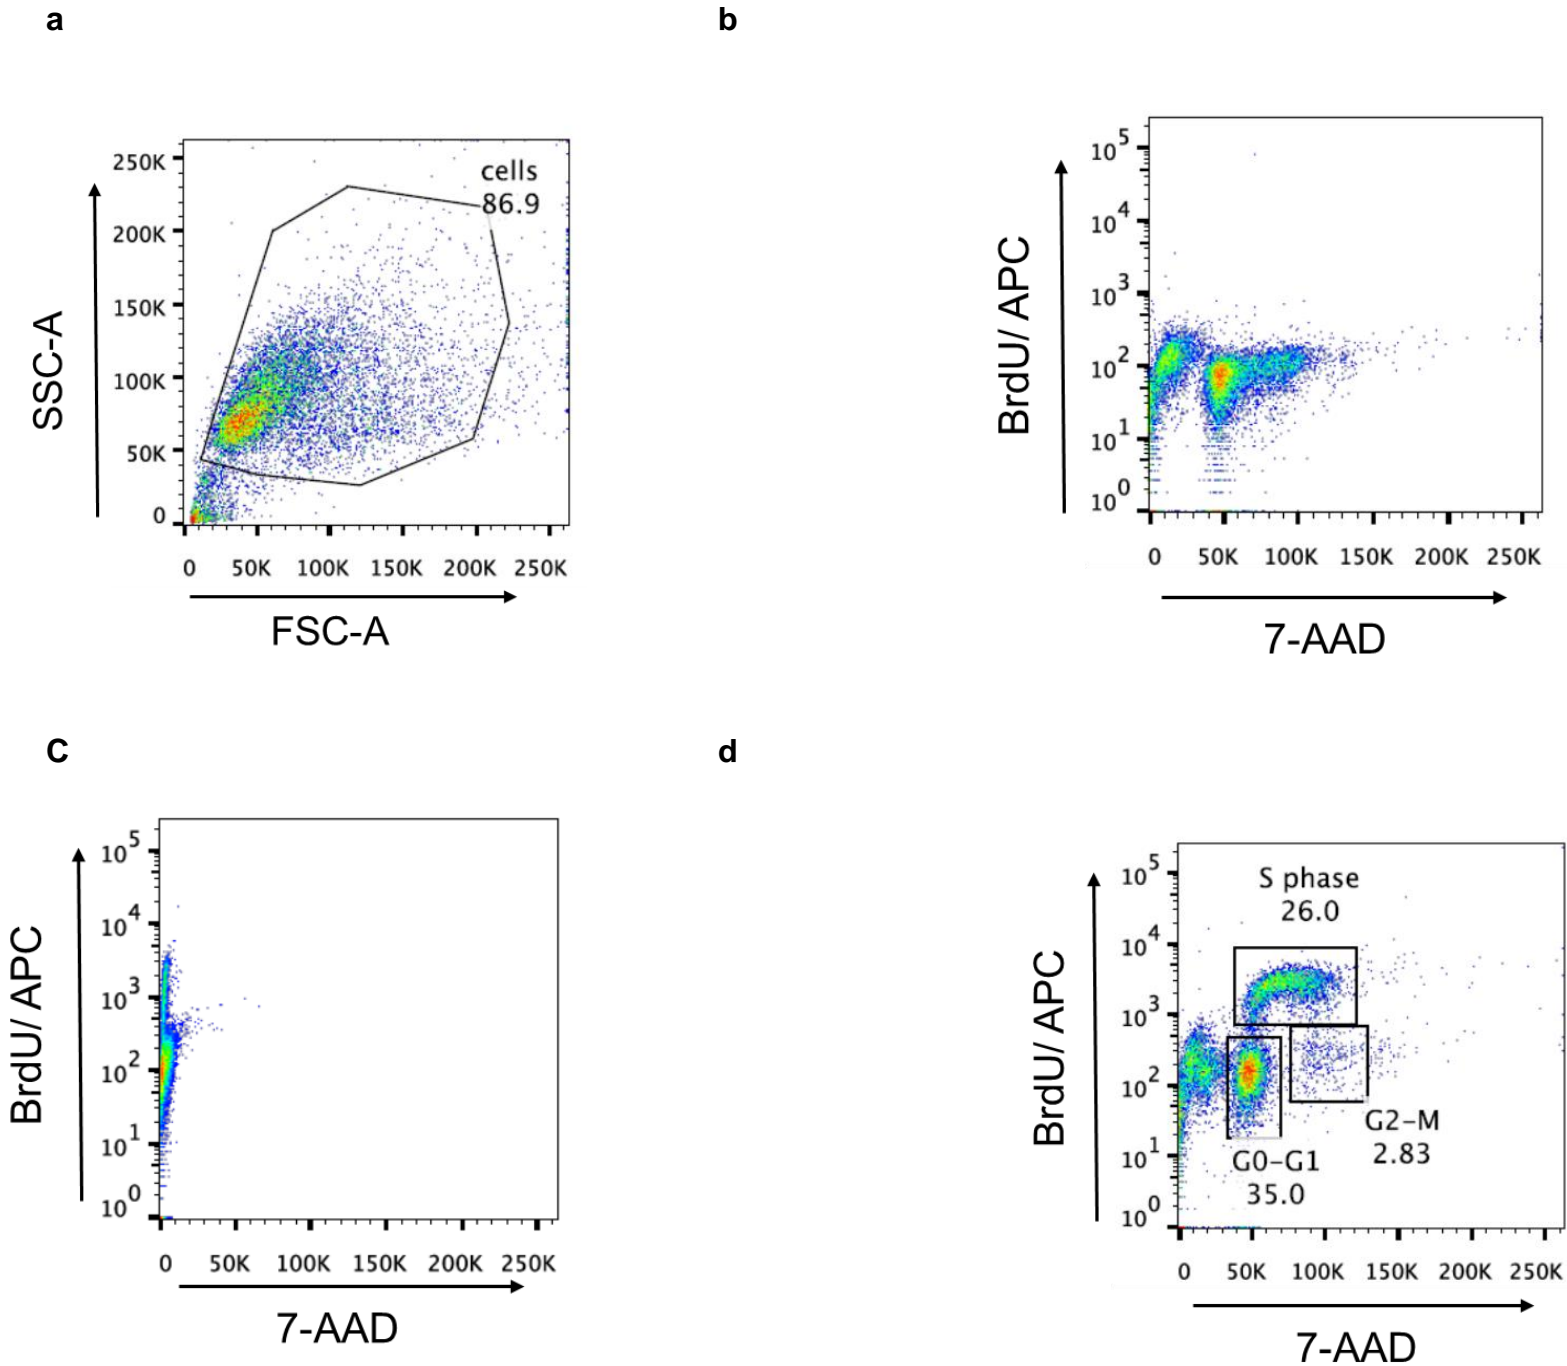

## Supplementary Tables

**Supplementary Table 1:** List of used oligonucleotides

|                          | <b>a. RT-qPCR Primers</b>                             |
|--------------------------|-------------------------------------------------------|
|                          | <b><i>HOXB-AS3</i></b>                                |
| Fw_Primer                | 5'-CCATTCTCGATCTTTTCAAGCG-3'                          |
| Rev_Primer               | 5'-AGGTTGCTTGTCTGGAGATG-3'                            |
| Probe                    | 5'-/56-FAM/CGCCTCATC/ZEN/GCTCTTATCTAAGCCC/3IABkFQ/    |
|                          | <b><i>Hoxb5os</i></b>                                 |
| Fw_Primer                | 5'-GAAAAGGGAGAGATGGAGGG-3'                            |
| Rev_Primer               | 5'-GAGCGACAGTGAGTTTACCG-3'                            |
| Probe                    | /56-FAM/CGTACTCAG/ZEN/GAGCAGGCCGAAC/3IABkFQ/          |
|                          | <b>5-ETS pre-rRNA</b>                                 |
| Fw_Primer                | CCCTCGGTGAGAAAAGCC                                    |
| Rv_Primer                | CATAACGGAGGCAGAGACAG                                  |
| Probe                    | /56-FAM/CGCCTCATC/ZEN/GCTCTTATCTAAGCCC/3IABkFQ/       |
|                          | <b>b. Gappers</b>                                     |
| Negative Control         | 5'-+C*+G*+A*A*T*A*G*T*T*A*G*T*A*+G*+C*+G-3'           |
| Anti- <i>NPM1</i> mut#1  | 5'-+C*+C*+A*G*A*C*A*G*A*G*A*T*C*T*T*G*A*+A*+T-3'      |
| Anti- <i>NPM1</i> mut#2  | 5'-+C*+T*G*C*C*A*G*A*C*A*G*A*G*A*T*C*T*+T*+G-3'       |
| Anti- <i>HOXB-AS3</i> #1 | 5'-+G*+G*A*G*G*G*A*A*T*T*G*T*A*G*+C*+G*+A-3'          |
| Anti- <i>HOXB-AS3</i> #2 | 5'-+T*+G*/iMe-dC/G*T*T*G*T*A*T*T*G*G*T*A*T*G*+G*+G-3' |
|                          | <b>c. CRISPR gRNA sequences</b>                       |
| <i>Hoxb5os_1a</i>        | 5'-AAAAGGGAGAGATGGAGGG-3'                             |
| <i>Hoxb5os_2a</i>        | 5'-TGTGTGTGTGCCCTCAGA-3'                              |

|                               |                                                                                                         |
|-------------------------------|---------------------------------------------------------------------------------------------------------|
| <i>Hoxb5os_2b</i>             | 5'-CAGTGAGTTTACCGGGCTG-3'                                                                               |
| <i>Hoxb5os_2c</i>             | 5'-GAGCGACAGTGAGTTTACC-3'                                                                               |
| <i>Hoxb5os_2d</i>             | 5'-ACAGTGAGTTTACCGGGCT-3'                                                                               |
| <i>Aurkb_a</i>                | 5'-GAAGAAGAGCCGTTTCATCG-3'                                                                              |
| <i>Aurkb_b</i>                | 5'-GCCTGGAATACGCCCCCTCGC-3'                                                                             |
| <b>d. RAP Probes</b>          |                                                                                                         |
| anti- <i>HOXB-AS3#1</i>       | /5Biosg/GTTGGTTAGTGGGTTTTGCCAGCTCCTTGGTTGGTGGGTCCGTGGT<br>GAAGGAATTGAACCGAATTTTCTGGAAACTGTTGATGTCTGCAA  |
| anti- <i>HOXB-AS3#2</i>       | /5Biosg/AAAGACAAACCGGGTCTGTGTTCTCCTGGTTGGTTAGTGGGTTTTGC<br>CAGCTCCTTGGTTGGTGGGTCCGTGGTGAAGGAATTGAACCGA  |
| anti- <i>HOXB-AS3#3</i>       | /5Biosg/CTGTTGATGTCTGCAAGTGAGTGCCGATCCCCTCCTCCATTCTCGATC<br>TTTTCAAGCGAAGTCTACCTCTGGGCTTAGATAAGAGCGATG  |
| anti- <i>HOXB-AS3#4</i>       | /5Biosg/CGAAGTCTACCTCTGGGCTTAGATAAGAGCGATGAGGCGCTATTTTCT<br>TTCATGCCCGACTCCAGGCGCCAGGCCCGCCTGTAGTGGCTC  |
| anti- <i>HOXB-AS3#5</i>       | /5Biosg/GGTGAGGAGGAAGCCGAGGGTCGTGGAGGCTCTACTTGGCCCTCCTT<br>TCCCTTACCCCTTGACTTTGTCTCCCTTTGTGCGATAGCAAAC  |
| anti- <i>HOXB-AS3#6</i>       | /5Biosg/TTTATTTTACTTTCTTTGTCTTAATTTATCTCGTTCTAAATTGATACAGAC<br>GACCCAAATAAACTTTAAAATAGGGGGTGGGGAAGGGA   |
| anti- <i>HOXB-AS3#7</i>       | /5Biosg/TGAGTCCGGGAGCAAGATCCTAAGAGGTGCGAGTTTACCAGGCCGGT<br>GTGGCCGCATCCCGGCCGCTCTCGGAGCCTGACCACGCCACGC  |
| anti- <i>HOXB-AS3#8</i>       | /5Biosg/CCGGGGCTTCTCCGAGCCTCTCTTCCCGCTCTCTGCGCCGCCGCCG<br>GCAGCCTGGAACCTTCTCCGCTGGTGC GGATATCGCTGGGTTC  |
| anti- <i>HOXB-AS3#9</i>       | /5Biosg/GTGCGGATATCGCTGGGTTCCCGGCAGCACTGGCATGTGAGGCCGGTG<br>GCGCTAAGGGACGTCCTGGTTTCTATAGGGCCTGGAATCTCCG |
| anti- <i>U1#1</i>             | /5Biosg/CAGGGGAAAGCGCGAACGCAGTCCCCCACTACCACAAATTATGCAGT<br>CGAGTTTCCCACATTTGGGGAAATCGCAGGGGTGAGCACATCC  |
| anti- <i>U1#2</i>             | /5Biosg/TTATGCAGTCGAGTTTCCCACATTTGGGGAAATCGCAGGGGTGAGCA<br>CATCCGGAGTGCAATGGATAAGCCTCGCCCTGGGAAAACCACC  |
| <b>e. Overlap PCR Primers</b> |                                                                                                         |
| 1 <sup>st</sup> Primer_Fw     | 5'-GGATAGTTTGCTATCGACAAAGGGAGAC-3'                                                                      |
| 1 <sup>st</sup>               | 5'-GTAGTGGCTCGTGAGGAGGAAGC-3'                                                                           |

|                   |                                  |
|-------------------|----------------------------------|
| Primer_Rev        |                                  |
| 2nd<br>Primer_Fw  | 5'-CCACTACTCGGCACTCACTTGCAG-3'   |
| 2nd<br>Primer_Rev | 5'-GAGTGCCGAGTAGTGGCTCCATC-3'    |
| 3rd<br>Primer_Fw  | 5'-ACTTGCAGAACCAGGAGAACACAGAC-3' |
| 3rd<br>Primer_Rev | 5'-CTGGTTCTGCAAGTGAGTGCCGA-3'    |
| Alt 5 end_Fw      | 5'-CGGCTTCCTCCTCACCAGC-3'        |
| Alt 3 end_Rev     | 5'-CCGTCAGTTCCACTCGGTTGT-3'      |

Abbreviations: Fw, forward; Rev: reverse; FAM, 6-carboxyfluorescein; ZEN, ZEN internal quencher; 3IABkFQ, 3' end Iowa black quencher; Biosg, biotinylated DNA base +, locked-nucleic acid-modified DNA base; \*, phosphorothioated DNA.





**Supplementary Table 3.** List of candidate RNA binding proteins identified to interact with the *HOXB-AS3* or the *U1* transcripts by mass spectrometry. The mean number of identified peptides for each candidate interacting protein is also provided. Proteins previously reported to interact with *U1* RNA are highlighted in yellow.

| Putative <i>HOXB-AS3</i> interactors | Number of identified peptides | Putative <i>U1</i> interactors | Number of identified peptides |
|--------------------------------------|-------------------------------|--------------------------------|-------------------------------|
| EBP1                                 | 13                            | RU17                           | 20                            |
| DHX9                                 | 9                             | SNRPA                          | 12                            |
| PHB1                                 | 9                             | RUXE                           | 8                             |
| MATR3                                | 8                             | SMD2                           | 7                             |
| NONO                                 | 8                             | SMD3                           | 7                             |
| HMGB2                                | 7                             | PLEC                           | 5                             |
| HNRNPU                               | 6                             | DDX3X                          | 4                             |
| PRDX3                                | 6                             | FLNB                           | 4                             |
| SFPQ                                 | 6                             | PPIB                           | 3                             |
| PARK7                                | 5                             |                                |                               |
| PTMA                                 | 5                             |                                |                               |
| SRSF2                                | 5                             |                                |                               |
| XRCC6                                | 5                             |                                |                               |
| HNRNPH1                              | 5                             |                                |                               |
| SF3B3                                | 4                             |                                |                               |
| HNRNPC                               | 4                             |                                |                               |
| HNRNPM                               | 4                             |                                |                               |
| HNRNPK                               | 4                             |                                |                               |
| HNRNPF                               | 4                             |                                |                               |
| STIP1                                | 4                             |                                |                               |
| PCBP1                                | 3                             |                                |                               |
| TCEA1                                | 3                             |                                |                               |

**Supplementary Table 4.** List of used antibodies

| <b>Antibody</b>                                            | <b>Provider</b>           | <b>Identifier</b> |
|------------------------------------------------------------|---------------------------|-------------------|
| Mouse Monoclonal anti-NPM1                                 | Abcam                     | Cat# ab10530      |
| Rabbit Polyclonal anti-EBP1                                | Abcam                     | Cat# ab33613      |
| Mouse Monoclonal anti-ACTB                                 | Cell Signaling Technology | Cat #58169        |
| Rabbit Polyclonal anti-DHX9                                | Abcam                     | Cat# ab26271      |
| Rabbit Monoclonal anti-HOXA9                               | Abcam                     | Cat# ab140631     |
| Rabbit Polyclonal anti-SC35 (SRSF2)                        | Abcam                     | Cat# ab28428      |
| Rabbit Polyclonal anti-nmt55/p54nrb (NONO)                 | Abcam                     | Cat# ab70335      |
| Rabbit Polyclonal anti-NPM1 mutant                         | OriGene                   | Cat# TA301725     |
| Mouse Polyclonal anti-PHB1                                 | Cell Signaling Technology | Cat# 2426S        |
| Rabbit Monoclonal anti-POLR1A                              | Cell Signaling Technology | Cat# 24799        |
| Mouse Monoclonal anti-MATR3                                | Millipore Sigma           | Cat# MABN1587     |
| Normal Rabbit IgG                                          | Millipore Sigma           | Cat# 12-370       |
| Normal Mouse IgG                                           | Millipore Sigma           | Cat# 12-371       |
| Mouse Monoclonal Anti-Mouse CD45.1, APC Conjugated         | BD Biosciences            | Cat# 558701       |
| Mouse Monoclonal Anti-Human CD45, Phycoerythrin Conjugated | BD Biosciences            | Cat# 555483       |
| Goat anti-Rabbit IgG, IRDye 800CW Conjugated               | LI-COR Biosciences        | Cat# 925-32211    |
| Goat anti-Mouse IgG, IRDye 680CW Conjugated                | LI-COR Biosciences        | Cat# 925-68070    |
| Goat anti-Mouse IgG, Alexa Fluor 488 Conjugated            | Thermo Fisher Scientific  | Cat# A-11029      |
| Goat anti-Rabbit IgG, Alexa Fluor 488 Conjugated           | Cell Signaling Technology | Cat# 4412         |
| Rabbit anti-FLAG                                           | Sigma-Aldrich             | Cat# F7425        |
